# Supplementary material for: Immune cell senescence and exhaustion promote the occurrence of liver metastasis in colorectal cancer by regulating epithelial-mesenchymal transformation
Source: publisher site journal article supplement (doi:10.18632/aging.205778), 2024-04-26
Supplement: Supplementary file [file aging-v16i9-205778-supplementary-material-SD2.pdf]

## SUPPLEMENTARY TABLES

**Supplementary Table 1. siRNA sequences and primer sequences.**

|                | <b>Sequencing</b>                                                            |
|----------------|------------------------------------------------------------------------------|
| si-SDC1        | Sense: CCUGCCGCAAAUUGUGGCUACUAAU<br>Antisense: AUUAGUAGCCACAAUUUGCGGCAGG     |
| si-SDC4        | Sense: GACCUCCUAGAAGGCCGAUACUUCU<br>Antisense: AGAAGUAUCGGCCUUCUAGGAGGUC     |
| CDH1           | Forward: 5'-CGAGAGCTACACGTTACGG-3'<br>Reverse: 5'-GGGTGTCGAGGGAAAAATAGG-3'   |
| CDH2           | Forward: 5'-AGCCAACCTTAACTGAGGAGT-3'<br>Reverse: 5'-GGCAAGTTGATTGGAGGGATG-3' |
| VIM            | Forward: 5'-GACGCCATCAACACCGAGTT-3'<br>Reverse: 5'-CTTTGTCGTTGGTTAGCTGGT-3'  |
| $\beta$ -Actin | Forward: 5'-AGGATGCAGAAGGAGATCAC-3'<br>Reverse: 5'-TGTAACGCAACTAAGTCATAG-3'  |

**Supplementary Table 2. Reverse transcription reaction mixture.**

| <b>Reagents</b>               | <b>Quantities/<math>\mu</math>L</b> |
|-------------------------------|-------------------------------------|
| 5 $\times$ gDNA Eraser Buffer | 2                                   |
| gDNA Eraser                   | 1                                   |
| Total RNA                     | 4                                   |
| RNase Free dH <sub>2</sub> O  | 3                                   |
| Total                         | 10                                  |

**Supplementary Table 3. Reverse transcription reaction system.**

| <b>Reagents</b>                        | <b>Quantities/<math>\mu</math>L</b> |
|----------------------------------------|-------------------------------------|
| Reverse transcription reaction mixture | 10                                  |
| PrimeScript RT Enzyme Mix I            | 1                                   |
| RT Primer Mix                          | 4                                   |
| 5 $\times$ PrimeScript Buffer 2        | 4                                   |
| RNase Free dH <sub>2</sub> O           | 1                                   |
| Total                                  | 20                                  |

**Supplementary Table 4. qRT-PCR reaction system.**

| <b>Reagents</b>                     | <b>Quantities/<math>\mu</math>L</b> |
|-------------------------------------|-------------------------------------|
| SYBR Premix Ex Taq <sup>TM</sup> II | 5                                   |
| Forward Primer (10 $\mu$ M)         | 0.2                                 |
| Reference Primer (10 $\mu$ M)       | 0.2                                 |
| Template DNA                        | 1                                   |
| ddH <sub>2</sub> O                  | 3.6                                 |
| Total                               | 10                                  |
